# Supplementary material for: Ancestry-agnostic estimation of DNA sample contamination from sequence reads
Source: HighWire-hosted journal article supplement (doi:10.1101/gr.246934.118), 2020-01-24
Supplement: Supplemental_Table_S1.xlsx [file Supplemental_Table_S1.xlsx]

## Sheet: Supplemental Table S1
Supplemental Table S1: Mean estimated contamination rates of in-silico contaminated population across different intended contamination rate, populations of intended and contaminating samples, and the estimation methods.
Population		Intended	Equal-	Unequal-	Pooled	EUR	EAS	AFR
		% Contam.	Ancestry	Ancestry	AF	AF	AF	AF
Intended	Contam.		(VB2)	(VB2)	(VB1)	(VB1)	(VB1)	(VB1)
GBR	GBR	0.01	0.01	0.01	0.008	0.01	0.006	0.005
		0.02	0.019	0.019	0.015	0.02	0.013	0.011
		0.05	0.046	0.046	0.038	0.047	0.032	0.027
		0.1	0.092	0.092	0.074	0.094	0.062	0.052
		0.2	0.183	0.183	0.147	0.185	0.116	0.095
GBR	CHS	0.01	0.011	0.01	0.009	0.012	0.007	0.006
		0.02	0.021	0.019	0.017	0.022	0.015	0.012
		0.05	0.052	0.047	0.043	0.053	0.038	0.031
		0.1	0.101	0.094	0.086	0.104	0.076	0.059
		0.2	0.198	0.187	0.173	0.199	0.151	0.109
GBR	YRI	0.01	0.013	0.011	0.011	0.014	0.008	0.007
		0.02	0.025	0.02	0.021	0.026	0.017	0.014
		0.05	0.059	0.048	0.05	0.061	0.042	0.036
		0.1	0.113	0.095	0.1	0.117	0.08	0.073
		0.2	0.216	0.191	0.197	0.22	0.148	0.146
CHS	GBR	0.01	0.012	0.009	0.004	0.002	0.012	0.001
		0.02	0.025	0.018	0.011	0.008	0.025	0.005
		0.05	0.061	0.048	0.036	0.029	0.063	0.02
		0.1	0.12	0.099	0.079	0.066	0.125	0.046
		0.2	0.23	0.198	0.166	0.142	0.236	0.094
CHS	CHS	0.01	0.009	0.009	0.002	0.001	0.009	0
		0.02	0.018	0.018	0.007	0.005	0.018	0.002
		0.05	0.047	0.048	0.024	0.019	0.047	0.013
		0.1	0.095	0.095	0.052	0.042	0.095	0.029
		0.2	0.191	0.191	0.106	0.084	0.189	0.059
CHS	YRI	0.01	0.014	0.009	0.005	0.003	0.014	0.001
		0.02	0.028	0.019	0.013	0.01	0.028	0.005
		0.05	0.067	0.048	0.041	0.033	0.069	0.023
		0.1	0.129	0.098	0.089	0.072	0.135	0.054
		0.2	0.243	0.196	0.186	0.142	0.249	0.122
YRI	GBR	0.01	0.013	0.01	0.006	0.004	0.004	0.014
		0.02	0.025	0.019	0.013	0.009	0.008	0.026
		0.05	0.06	0.046	0.038	0.028	0.026	0.064
		0.1	0.115	0.093	0.081	0.062	0.056	0.125
		0.2	0.219	0.188	0.167	0.13	0.111	0.235
YRI	CHS	0.01	0.013	0.009	0.005	0.004	0.003	0.013
		0.02	0.025	0.019	0.013	0.009	0.008	0.026
		0.05	0.06	0.047	0.038	0.028	0.025	0.063
		0.1	0.115	0.093	0.079	0.059	0.056	0.122
		0.2	0.22	0.188	0.166	0.12	0.121	0.229
YRI	YRI	0.01	0.009	0.009	0.004	0.002	0.002	0.009
		0.02	0.018	0.018	0.009	0.006	0.005	0.018
		0.05	0.044	0.044	0.024	0.018	0.016	0.044
		0.1	0.088	0.088	0.051	0.038	0.034	0.089
		0.2	0.176	0.176	0.101	0.073	0.066	0.179
Equal-Ancestry Model:			Estimate from verifyBamID2 assuming intended and contaminating samples have the same genetic ancestry (in PC coordinates)
Unequal-Ancestry Model:			Estimate from verifyBamID2 allowing intended and contaminating samples to have different genetic ancestry
Pooled AF:			Estimate from original verifyBamID using allele frequency across all 1000 Genomes phase 3 samples
EUR AF:			Estimate from original verifyBamID using allele frequency across European subset of 1000 Genomes phase 3 samples
EAS AF:			Estimate from original verifyBamID using allele frequency across East Asian subset of 1000 Genomes phase 3 samples
AFR AF:			Estimate from original verifyBamID using allele frequency across African subset of 1000 Genomes phase 3 samples
