# Supplementary material for: Ancestry-agnostic estimation of DNA sample contamination from sequence reads
Source: HighWire-hosted journal article supplement (doi:10.1101/gr.246934.118), 2020-01-24
Supplement: Supplemental_Table_S2.xlsx [file Supplemental_Table_S2.xlsx]

## Sheet: Supplemental Table S2
Supplemental Table S2: Average of estimated contamination rates across 10 in-silico contaminated samples from Mexican population under different models. Results are similar as Europeans, except that unequal-ancestry model slightly reduces estimated contamination rate from equal-ancestry model, unlike GBR.
Intended %	Equal-	Unequal-	Pooled	EUR	EAS	AFR
Contamination	Ancestry	Ancestry	AF	AF	AF	AF
	(VB2)	(VB2)	(VB1)	(VB1)	(VB1)	(VB1)
0.01	0.011	0.01	0.008	0.01	0.006	0.003
0.02	0.021	0.021	0.016	0.02	0.014	0.009
0.05	0.048	0.048	0.039	0.046	0.035	0.025
0.1	0.093	0.092	0.078	0.088	0.068	0.049
0.2	0.185	0.183	0.154	0.17	0.13	0.094
