# Supplementary material for: Ancestry-agnostic estimation of DNA sample contamination from sequence reads
Source: HighWire-hosted journal article supplement (doi:10.1101/gr.246934.118), 2020-01-24
Supplement: Supplemental_Table_S3.xlsx [file Supplemental_Table_S3.xlsx]

## Sheet: Supplemental Table S3
Supplemental Table S3: Comparison of mean contamination rate ratio (Estimated/Intended) using different size of marker set (under Unequal-Ancestry Model). The Numbers in parenthesis represent standard deviation.
Sample Population		Marker Set	Intended Contamination Rate
Intended	Contam.		0.01	0.02	0.05	0.1	0.2
GBR	GBR	1K	0.57(0.15)	0.88(0.38)	0.87(0.28)	0.92(0.18)	0.95(0.12)
		10K	0.98(0.13)	0.95(0.11)	0.93(0.09)	0.91(0.08)	0.91(0.07)
		100K	1.00(0.10)	0.96(0.09)	0.93(0.08)	0.92(0.06)	0.91(0.05)
CHS	CHS	1K	1.38(1.26)	1.09(0.63)	1.00(0.44)	0.95(0.41)	0.95(0.21)
		10K	1.08(0.48)	1.03(0.26)	1.00(0.12)	1.01(0.08)	0.96(0.06)
		100K	0.89(0.12)	0.92(0.08)	0.95(0.07)	0.95(0.05)	0.96(0.04)
YRI	YRI	1K	1.23(0.86)	0.92(0.46)	0.98(0.30)	0.95(0.16)	0.97(0.10)
		10K	0.91(0.20)	0.87(0.17)	0.89(0.05)	0.88(0.04)	0.90(0.03)
		100K	0.94(0.08)	0.92(0.07)	0.88(0.04)	0.88(0.04)	0.88(0.03)
CHS	YRI	1K	1.07(0.90)	1.03(0.61)	0.95(0.37)	0.97(0.22)	0.91(0.12)
		10K	1.00(0.46)	0.99(0.22)	1.02(0.12)	1.02(0.08)	0.99(0.06)
		100K	0.88(0.14)	0.93(0.10)	0.96(0.06)	0.98(0.05)	0.98(0.04)
YRI	CHS	1K	1.00(0.49)	1.00(0.35)	0.91(0.24)	1.00(0.17)	1.01(0.10)
		10K	1.02(0.10)	1.00(0.07)	0.95(0.03)	0.94(0.03)	0.94(0.02)
		100K	0.94(0.15)	0.95(0.09)	0.93(0.05)	0.93(0.03)	0.94(0.03)
GBR	YRI	1K	1.10(0.49)	1.10(0.28)	1.06(0.30)	0.98(0.18)	0.97(0.09)
		10K	0.94(0.23)	0.98(0.10)	0.94(0.06)	0.93(0.04)	0.94(0.03)
		100K	1.07(0.09)	1.02(0.08)	0.97(0.06)	0.95(0.05)	0.95(0.04)
YRI	GBR	1K	1.13(0.56)	0.78(0.36)	0.84(0.19)	0.93(0.11)	0.98(0.06)
		10K	0.92(0.24)	0.89(0.15)	0.91(0.06)	0.93(0.05)	0.94(0.05)
		100K	0.95(0.15)	0.93(0.08)	0.93(0.08)	0.93(0.06)	0.94(0.06)
CHS	GBR	1K	1.28(1.24)	1.12(0.70)	1.00(0.40)	0.95(0.21)	0.97(0.13)
		10K	1.06(0.54)	1.01(0.33)	1.00(0.14)	1.00(0.07)	0.98(0.05)
		100K	0.91(0.06)	0.92(0.07)	0.97(0.07)	0.99(0.06)	0.99(0.05)
GBR	CHS	1K	0.89(0.47)	0.83(0.42)	0.84(0.17)	0.91(0.14)	0.92(0.13)
		10K	0.97(0.17)	0.93(0.11)	0.94(0.08)	0.94(0.06)	0.92(0.06)
		100K	1.01(0.12)	0.97(0.10)	0.93(0.08)	0.94(0.07)	0.94(0.06)
