# Supplementary material for: Ancestry-agnostic estimation of DNA sample contamination from sequence reads
Source: HighWire-hosted journal article supplement (doi:10.1101/gr.246934.118), 2020-01-24
Supplement: Supplemental_Table_S4.xlsx [file Supplemental_Table_S4.xlsx]

## Sheet: Supplemental Table S4
Supplementary Table S4. A full table summarizing the contamination rate ratio (Estimated/Intended) across various simulation parameters, populations, and estimation methods shown in Figure 4. 100K marker sets were used.
Sample Population		Method	Allele Frequencies	Intended	Mean	SD	MSE
Intended	Contam.			% Contam
GBR	GBR	VB1	AFR	0.01	0.52	0.11	0.242
GBR	GBR	VB1	AFR	0.02	0.53	0.09	0.223
GBR	GBR	VB1	AFR	0.05	0.53	0.06	0.221
GBR	GBR	VB1	AFR	0.1	0.52	0.05	0.237
GBR	GBR	VB1	AFR	0.2	0.48	0.04	0.276
GBR	GBR	VB1	EUR	0.01	1.04	0.1	0.012
GBR	GBR	VB1	EUR	0.02	0.98	0.09	0.007
GBR	GBR	VB1	EUR	0.05	0.95	0.07	0.008
GBR	GBR	VB1	EUR	0.1	0.94	0.06	0.008
GBR	GBR	VB1	EUR	0.2	0.92	0.05	0.008
GBR	GBR	VB1	EAS	0.01	0.65	0.11	0.136
GBR	GBR	VB1	EAS	0.02	0.65	0.09	0.132
GBR	GBR	VB1	EAS	0.05	0.64	0.06	0.135
GBR	GBR	VB1	EAS	0.1	0.62	0.05	0.148
GBR	GBR	VB1	EAS	0.2	0.58	0.05	0.179
GBR	GBR	VB1	Pooled	0.01	0.79	0.11	0.055
GBR	GBR	VB1	Pooled	0.02	0.77	0.08	0.06
GBR	GBR	VB1	Pooled	0.05	0.75	0.07	0.066
GBR	GBR	VB1	Pooled	0.1	0.74	0.06	0.069
GBR	GBR	VB1	Pooled	0.2	0.73	0.05	0.073
GBR	GBR	VB2	ISAF (Equal-Ancestry)	0.01	1.02	0.11	0.01
GBR	GBR	VB2	ISAF (Equal-Ancestry)	0.02	0.96	0.09	0.009
GBR	GBR	VB2	ISAF (Equal -Ancestry)	0.05	0.93	0.07	0.01
GBR	GBR	VB2	ISAF (Equal -Ancestry)	0.1	0.92	0.06	0.01
GBR	GBR	VB2	ISAF (Equal -Ancestry)	0.2	0.91	0.05	0.01
GBR	GBR	VB2	ISAF (Unequal-Ancestry)	0.01	1	0.1	0.009
GBR	GBR	VB2	ISAF (Unequal-Ancestry)	0.02	0.96	0.09	0.009
GBR	GBR	VB2	ISAF (Unequal-Ancestry)	0.05	0.93	0.08	0.011
GBR	GBR	VB2	ISAF (Unequal-Ancestry)	0.1	0.92	0.06	0.01
GBR	GBR	VB2	ISAF (Unequal-Ancestry)	0.2	0.91	0.05	0.01
GBR	CHS	VB1	AFR	0.01	0.59	0.08	0.172
GBR	CHS	VB1	AFR	0.02	0.6	0.06	0.162
GBR	CHS	VB1	AFR	0.05	0.61	0.05	0.154
GBR	CHS	VB1	AFR	0.1	0.59	0.04	0.169
GBR	CHS	VB1	AFR	0.2	0.55	0.03	0.206
GBR	CHS	VB1	EUR	0.01	1.17	0.11	0.039
GBR	CHS	VB1	EUR	0.02	1.09	0.1	0.016
GBR	CHS	VB1	EUR	0.05	1.06	0.08	0.01
GBR	CHS	VB1	EUR	0.1	1.04	0.07	0.006
GBR	CHS	VB1	EUR	0.2	0.99	0.06	0.003
GBR	CHS	VB1	EAS	0.01	0.74	0.09	0.074
GBR	CHS	VB1	EAS	0.02	0.74	0.07	0.072
GBR	CHS	VB1	EAS	0.05	0.76	0.06	0.063
GBR	CHS	VB1	EAS	0.1	0.76	0.05	0.061
GBR	CHS	VB1	EAS	0.2	0.75	0.04	0.062
GBR	CHS	VB1	Pooled	0.01	0.89	0.09	0.019
GBR	CHS	VB1	Pooled	0.02	0.86	0.07	0.025
GBR	CHS	VB1	Pooled	0.05	0.86	0.06	0.022
GBR	CHS	VB1	Pooled	0.1	0.86	0.06	0.022
GBR	CHS	VB1	Pooled	0.2	0.86	0.05	0.021
GBR	CHS	VB2	ISAF (Equal-Ancestry)	0.01	1.13	0.11	0.028
GBR	CHS	VB2	ISAF (Equal-Ancestry)	0.02	1.06	0.09	0.011
GBR	CHS	VB2	ISAF (Equal -Ancestry)	0.05	1.03	0.08	0.007
GBR	CHS	VB2	ISAF (Equal -Ancestry)	0.1	1.01	0.07	0.004
GBR	CHS	VB2	ISAF (Equal -Ancestry)	0.2	0.99	0.06	0.004
GBR	CHS	VB2	ISAF (Unequal-Ancestry)	0.01	1.01	0.12	0.012
GBR	CHS	VB2	ISAF (Unequal-Ancestry)	0.02	0.97	0.1	0.01
GBR	CHS	VB2	ISAF (Unequal-Ancestry)	0.05	0.93	0.08	0.01
GBR	CHS	VB2	ISAF (Unequal-Ancestry)	0.1	0.94	0.07	0.008
GBR	CHS	VB2	ISAF (Unequal-Ancestry)	0.2	0.94	0.06	0.007
GBR	YRI	VB1	AFR	0.01	0.67	0.11	0.119
GBR	YRI	VB1	AFR	0.02	0.7	0.09	0.096
GBR	YRI	VB1	AFR	0.05	0.72	0.06	0.082
GBR	YRI	VB1	AFR	0.1	0.73	0.05	0.077
GBR	YRI	VB1	AFR	0.2	0.73	0.04	0.074
GBR	YRI	VB1	EUR	0.01	1.38	0.1	0.15
GBR	YRI	VB1	EUR	0.02	1.3	0.09	0.097
GBR	YRI	VB1	EUR	0.05	1.23	0.07	0.055
GBR	YRI	VB1	EUR	0.1	1.17	0.05	0.032
GBR	YRI	VB1	EUR	0.2	1.1	0.04	0.011
GBR	YRI	VB1	EAS	0.01	0.85	0.1	0.032
GBR	YRI	VB1	EAS	0.02	0.85	0.08	0.028
GBR	YRI	VB1	EAS	0.05	0.83	0.06	0.031
GBR	YRI	VB1	EAS	0.1	0.8	0.04	0.042
GBR	YRI	VB1	EAS	0.2	0.74	0.03	0.069
GBR	YRI	VB1	Pooled	0.01	1.05	0.09	0.01
GBR	YRI	VB1	Pooled	0.02	1.03	0.08	0.007
GBR	YRI	VB1	Pooled	0.05	1.01	0.06	0.003
GBR	YRI	VB1	Pooled	0.1	1	0.05	0.002
GBR	YRI	VB1	Pooled	0.2	0.99	0.04	0.002
GBR	YRI	VB2	ISAF (Equal-Ancestry)	0.01	1.33	0.09	0.118
GBR	YRI	VB2	ISAF (Equal-Ancestry)	0.02	1.26	0.09	0.074
GBR	YRI	VB2	ISAF (Equal -Ancestry)	0.05	1.18	0.06	0.036
GBR	YRI	VB2	ISAF (Equal -Ancestry)	0.1	1.13	0.05	0.018
GBR	YRI	VB2	ISAF (Equal -Ancestry)	0.2	1.08	0.04	0.008
GBR	YRI	VB2	ISAF (Unequal-Ancestry)	0.01	1.07	0.09	0.014
GBR	YRI	VB2	ISAF (Unequal-Ancestry)	0.02	1.02	0.08	0.006
GBR	YRI	VB2	ISAF (Unequal-Ancestry)	0.05	0.97	0.06	0.004
GBR	YRI	VB2	ISAF (Unequal-Ancestry)	0.1	0.95	0.05	0.004
GBR	YRI	VB2	ISAF (Unequal-Ancestry)	0.2	0.95	0.04	0.004
CHS	GBR	VB1	AFR	0.01	0.07	0.04	0.868
CHS	GBR	VB1	AFR	0.02	0.23	0.05	0.597
CHS	GBR	VB1	AFR	0.05	0.4	0.04	0.366
CHS	GBR	VB1	AFR	0.1	0.46	0.03	0.29
CHS	GBR	VB1	AFR	0.2	0.47	0.02	0.282
CHS	GBR	VB1	EUR	0.01	0.21	0.05	0.625
CHS	GBR	VB1	EUR	0.02	0.4	0.05	0.364
CHS	GBR	VB1	EUR	0.05	0.57	0.05	0.184
CHS	GBR	VB1	EUR	0.1	0.66	0.04	0.119
CHS	GBR	VB1	EUR	0.2	0.71	0.04	0.087
CHS	GBR	VB1	EAS	0.01	1.24	0.11	0.069
CHS	GBR	VB1	EAS	0.02	1.26	0.1	0.075
CHS	GBR	VB1	EAS	0.05	1.27	0.08	0.077
CHS	GBR	VB1	EAS	0.1	1.25	0.06	0.066
CHS	GBR	VB1	EAS	0.2	1.18	0.05	0.035
CHS	GBR	VB1	Pooled	0.01	0.36	0.06	0.409
CHS	GBR	VB1	Pooled	0.02	0.55	0.06	0.207
CHS	GBR	VB1	Pooled	0.05	0.71	0.05	0.086
CHS	GBR	VB1	Pooled	0.1	0.79	0.05	0.047
CHS	GBR	VB1	Pooled	0.2	0.83	0.04	0.031
CHS	GBR	VB2	ISAF (Equal-Ancestry)	0.01	1.22	0.11	0.06
CHS	GBR	VB2	ISAF (Equal-Ancestry)	0.02	1.23	0.1	0.06
CHS	GBR	VB2	ISAF (Equal -Ancestry)	0.05	1.23	0.08	0.057
CHS	GBR	VB2	ISAF (Equal -Ancestry)	0.1	1.2	0.06	0.044
CHS	GBR	VB2	ISAF (Equal -Ancestry)	0.2	1.15	0.05	0.025
CHS	GBR	VB2	ISAF (Unequal-Ancestry)	0.01	0.91	0.06	0.011
CHS	GBR	VB2	ISAF (Unequal-Ancestry)	0.02	0.92	0.07	0.01
CHS	GBR	VB2	ISAF (Unequal-Ancestry)	0.05	0.97	0.07	0.005
CHS	GBR	VB2	ISAF (Unequal-Ancestry)	0.1	0.99	0.06	0.004
CHS	GBR	VB2	ISAF (Unequal-Ancestry)	0.2	0.99	0.05	0.003
CHS	CHS	VB1	AFR	0.01	0.02	0.03	0.956
CHS	CHS	VB1	AFR	0.02	0.12	0.05	0.782
CHS	CHS	VB1	AFR	0.05	0.25	0.03	0.562
CHS	CHS	VB1	AFR	0.1	0.29	0.02	0.5
CHS	CHS	VB1	AFR	0.2	0.29	0.01	0.5
CHS	CHS	VB1	EUR	0.01	0.1	0.07	0.815
CHS	CHS	VB1	EUR	0.02	0.24	0.05	0.573
CHS	CHS	VB1	EUR	0.05	0.38	0.03	0.385
CHS	CHS	VB1	EUR	0.1	0.42	0.02	0.338
CHS	CHS	VB1	EUR	0.2	0.42	0.02	0.337
CHS	CHS	VB1	EAS	0.01	0.9	0.1	0.02
CHS	CHS	VB1	EAS	0.02	0.92	0.07	0.011
CHS	CHS	VB1	EAS	0.05	0.95	0.06	0.006
CHS	CHS	VB1	EAS	0.1	0.95	0.04	0.004
CHS	CHS	VB1	EAS	0.2	0.94	0.03	0.004
CHS	CHS	VB1	Pooled	0.01	0.19	0.08	0.659
CHS	CHS	VB1	Pooled	0.02	0.34	0.05	0.435
CHS	CHS	VB1	Pooled	0.05	0.48	0.04	0.275
CHS	CHS	VB1	Pooled	0.1	0.52	0.03	0.233
CHS	CHS	VB1	Pooled	0.2	0.53	0.02	0.222
CHS	CHS	VB2	ISAF (Equal-Ancestry)	0.01	0.9	0.11	0.021
CHS	CHS	VB2	ISAF (Equal-Ancestry)	0.02	0.91	0.07	0.012
CHS	CHS	VB2	ISAF (Equal -Ancestry)	0.05	0.95	0.06	0.006
CHS	CHS	VB2	ISAF (Equal -Ancestry)	0.1	0.95	0.04	0.004
CHS	CHS	VB2	ISAF (Equal -Ancestry)	0.2	0.95	0.03	0.003
CHS	CHS	VB2	ISAF (Unequal-Ancestry)	0.01	0.89	0.12	0.024
CHS	CHS	VB2	ISAF (Unequal-Ancestry)	0.02	0.92	0.08	0.012
CHS	CHS	VB2	ISAF (Unequal-Ancestry)	0.05	0.95	0.07	0.006
CHS	CHS	VB2	ISAF (Unequal-Ancestry)	0.1	0.95	0.05	0.004
CHS	CHS	VB2	ISAF (Unequal-Ancestry)	0.2	0.96	0.04	0.003
CHS	YRI	VB1	AFR	0.01	0.09	0.09	0.828
CHS	YRI	VB1	AFR	0.02	0.27	0.08	0.543
CHS	YRI	VB1	AFR	0.05	0.45	0.05	0.302
CHS	YRI	VB1	AFR	0.1	0.54	0.04	0.21
CHS	YRI	VB1	AFR	0.2	0.61	0.03	0.155
CHS	YRI	VB1	EUR	0.01	0.31	0.11	0.492
CHS	YRI	VB1	EUR	0.02	0.51	0.08	0.25
CHS	YRI	VB1	EUR	0.05	0.67	0.05	0.114
CHS	YRI	VB1	EUR	0.1	0.72	0.04	0.083
CHS	YRI	VB1	EUR	0.2	0.71	0.03	0.084
CHS	YRI	VB1	EAS	0.01	1.38	0.14	0.161
CHS	YRI	VB1	EAS	0.02	1.39	0.1	0.163
CHS	YRI	VB1	EAS	0.05	1.38	0.07	0.151
CHS	YRI	VB1	EAS	0.1	1.35	0.06	0.123
CHS	YRI	VB1	EAS	0.2	1.24	0.04	0.061
CHS	YRI	VB1	Pooled	0.01	0.47	0.13	0.298
CHS	YRI	VB1	Pooled	0.02	0.66	0.09	0.123
CHS	YRI	VB1	Pooled	0.05	0.82	0.06	0.036
CHS	YRI	VB1	Pooled	0.1	0.89	0.05	0.015
CHS	YRI	VB1	Pooled	0.2	0.93	0.04	0.007
CHS	YRI	VB2	ISAF (Equal-Ancestry)	0.01	1.37	0.14	0.157
CHS	YRI	VB2	ISAF (Equal-Ancestry)	0.02	1.38	0.11	0.154
CHS	YRI	VB2	ISAF (Equal -Ancestry)	0.05	1.34	0.07	0.122
CHS	YRI	VB2	ISAF (Equal -Ancestry)	0.1	1.29	0.06	0.085
CHS	YRI	VB2	ISAF (Equal -Ancestry)	0.2	1.22	0.05	0.048
CHS	YRI	VB2	ISAF (Unequal-Ancestry)	0.01	0.88	0.14	0.033
CHS	YRI	VB2	ISAF (Unequal-Ancestry)	0.02	0.93	0.1	0.014
CHS	YRI	VB2	ISAF (Unequal-Ancestry)	0.05	0.96	0.06	0.005
CHS	YRI	VB2	ISAF (Unequal-Ancestry)	0.1	0.98	0.05	0.002
CHS	YRI	VB2	ISAF (Unequal-Ancestry)	0.2	0.98	0.04	0.002
YRI	GBR	VB1	AFR	0.01	1.43	0.23	0.236
YRI	GBR	VB1	AFR	0.02	1.31	0.14	0.113
YRI	GBR	VB1	AFR	0.05	1.28	0.08	0.081
YRI	GBR	VB1	AFR	0.1	1.25	0.07	0.065
YRI	GBR	VB1	AFR	0.2	1.17	0.06	0.034
YRI	GBR	VB1	EUR	0.01	0.36	0.22	0.453
YRI	GBR	VB1	EUR	0.02	0.46	0.19	0.329
YRI	GBR	VB1	EUR	0.05	0.56	0.11	0.201
YRI	GBR	VB1	EUR	0.1	0.62	0.07	0.153
YRI	GBR	VB1	EUR	0.2	0.65	0.05	0.124
YRI	GBR	VB1	EAS	0.01	0.32	0.2	0.504
YRI	GBR	VB1	EAS	0.02	0.41	0.18	0.38
YRI	GBR	VB1	EAS	0.05	0.52	0.11	0.245
YRI	GBR	VB1	EAS	0.1	0.55	0.07	0.204
YRI	GBR	VB1	EAS	0.2	0.56	0.04	0.198
YRI	GBR	VB1	Pooled	0.01	0.57	0.26	0.248
YRI	GBR	VB1	Pooled	0.02	0.67	0.17	0.138
YRI	GBR	VB1	Pooled	0.05	0.76	0.1	0.066
YRI	GBR	VB1	Pooled	0.1	0.8	0.07	0.043
YRI	GBR	VB1	Pooled	0.2	0.83	0.05	0.03
YRI	GBR	VB2	ISAF (Equal-Ancestry)	0.01	1.3	0.15	0.107
YRI	GBR	VB2	ISAF (Equal-Ancestry)	0.02	1.25	0.11	0.072
YRI	GBR	VB2	ISAF (Equal -Ancestry)	0.05	1.2	0.09	0.048
YRI	GBR	VB2	ISAF (Equal -Ancestry)	0.1	1.15	0.07	0.028
YRI	GBR	VB2	ISAF (Equal -Ancestry)	0.2	1.1	0.07	0.013
YRI	GBR	VB2	ISAF (Unequal-Ancestry)	0.01	0.95	0.15	0.021
YRI	GBR	VB2	ISAF (Unequal-Ancestry)	0.02	0.93	0.08	0.012
YRI	GBR	VB2	ISAF (Unequal-Ancestry)	0.05	0.93	0.08	0.011
YRI	GBR	VB2	ISAF (Unequal-Ancestry)	0.1	0.93	0.06	0.008
YRI	GBR	VB2	ISAF (Unequal-Ancestry)	0.2	0.94	0.06	0.006
YRI	CHS	VB1	AFR	0.01	1.32	0.13	0.12
YRI	CHS	VB1	AFR	0.02	1.3	0.11	0.098
YRI	CHS	VB1	AFR	0.05	1.26	0.07	0.071
YRI	CHS	VB1	AFR	0.1	1.22	0.05	0.049
YRI	CHS	VB1	AFR	0.2	1.14	0.04	0.022
YRI	CHS	VB1	EUR	0.01	0.35	0.2	0.455
YRI	CHS	VB1	EUR	0.02	0.46	0.18	0.319
YRI	CHS	VB1	EUR	0.05	0.56	0.1	0.204
YRI	CHS	VB1	EUR	0.1	0.59	0.06	0.168
YRI	CHS	VB1	EUR	0.2	0.6	0.03	0.159
YRI	CHS	VB1	EAS	0.01	0.29	0.17	0.528
YRI	CHS	VB1	EAS	0.02	0.4	0.18	0.395
YRI	CHS	VB1	EAS	0.05	0.51	0.11	0.252
YRI	CHS	VB1	EAS	0.1	0.56	0.06	0.194
YRI	CHS	VB1	EAS	0.2	0.61	0.03	0.157
YRI	CHS	VB1	Pooled	0.01	0.55	0.24	0.259
YRI	CHS	VB1	Pooled	0.02	0.66	0.16	0.136
YRI	CHS	VB1	Pooled	0.05	0.75	0.09	0.068
YRI	CHS	VB1	Pooled	0.1	0.79	0.04	0.044
YRI	CHS	VB1	Pooled	0.2	0.83	0.02	0.03
YRI	CHS	VB2	ISAF (Equal-Ancestry)	0.01	1.29	0.13	0.098
YRI	CHS	VB2	ISAF (Equal-Ancestry)	0.02	1.25	0.11	0.074
YRI	CHS	VB2	ISAF (Equal -Ancestry)	0.05	1.2	0.07	0.043
YRI	CHS	VB2	ISAF (Equal -Ancestry)	0.1	1.15	0.04	0.023
YRI	CHS	VB2	ISAF (Equal -Ancestry)	0.2	1.1	0.04	0.011
YRI	CHS	VB2	ISAF (Unequal-Ancestry)	0.01	0.94	0.15	0.023
YRI	CHS	VB2	ISAF (Unequal-Ancestry)	0.02	0.95	0.09	0.01
YRI	CHS	VB2	ISAF (Unequal-Ancestry)	0.05	0.93	0.05	0.007
YRI	CHS	VB2	ISAF (Unequal-Ancestry)	0.1	0.93	0.03	0.005
YRI	CHS	VB2	ISAF (Unequal-Ancestry)	0.2	0.94	0.03	0.004
YRI	YRI	VB1	AFR	0.01	0.95	0.09	0.01
YRI	YRI	VB1	AFR	0.02	0.92	0.06	0.009
YRI	YRI	VB1	AFR	0.05	0.89	0.05	0.014
YRI	YRI	VB1	AFR	0.1	0.89	0.04	0.013
YRI	YRI	VB1	AFR	0.2	0.89	0.03	0.012
YRI	YRI	VB1	EUR	0.01	0.22	0.13	0.619
YRI	YRI	VB1	EUR	0.02	0.29	0.14	0.518
YRI	YRI	VB1	EUR	0.05	0.36	0.09	0.423
YRI	YRI	VB1	EUR	0.1	0.38	0.06	0.391
YRI	YRI	VB1	EUR	0.2	0.36	0.03	0.405
YRI	YRI	VB1	EAS	0.01	0.18	0.11	0.68
YRI	YRI	VB1	EAS	0.02	0.25	0.13	0.575
YRI	YRI	VB1	EAS	0.05	0.32	0.09	0.474
YRI	YRI	VB1	EAS	0.1	0.34	0.06	0.438
YRI	YRI	VB1	EAS	0.2	0.33	0.03	0.452
YRI	YRI	VB1	Pooled	0.01	0.36	0.18	0.433
YRI	YRI	VB1	Pooled	0.02	0.44	0.14	0.333
YRI	YRI	VB1	Pooled	0.05	0.49	0.08	0.267
YRI	YRI	VB1	Pooled	0.1	0.51	0.05	0.242
YRI	YRI	VB1	Pooled	0.2	0.51	0.03	0.245
YRI	YRI	VB2	ISAF (Equal-Ancestry)	0.01	0.94	0.1	0.012
YRI	YRI	VB2	ISAF (Equal-Ancestry)	0.02	0.92	0.06	0.011
YRI	YRI	VB2	ISAF (Equal -Ancestry)	0.05	0.88	0.04	0.016
YRI	YRI	VB2	ISAF (Equal -Ancestry)	0.1	0.88	0.04	0.015
YRI	YRI	VB2	ISAF (Equal -Ancestry)	0.2	0.88	0.03	0.015
YRI	YRI	VB2	ISAF (Unequal-Ancestry)	0.01	0.94	0.08	0.01
YRI	YRI	VB2	ISAF (Unequal-Ancestry)	0.02	0.92	0.07	0.011
YRI	YRI	VB2	ISAF (Unequal-Ancestry)	0.05	0.88	0.04	0.016
YRI	YRI	VB2	ISAF (Unequal-Ancestry)	0.1	0.88	0.04	0.015
YRI	YRI	VB2	ISAF (Unequal-Ancestry)	0.2	0.88	0.03	0.015
